# Supplementary material for: Alzheimer’s Disease Risk Variant rs3865444 in the CD33 Gene: A Possible Role in Susceptibility to Multiple Sclerosis
Source: MDPI journal article supplement (doi:10.3390/life12071094), 2022-07-21
Supplement: s1 [file s1]

**Supplementary Table S1.** Association between *HLA-DRB1\*15:01* allele and MS.

| <i>HLA-DRB1*15:01</i><br>allele | MS<br>( <i>n</i> = 579) | Controls<br>( <i>n</i> = 1145) | Genetic model                      | Logistic regression analysis |                    |
|---------------------------------|-------------------------|--------------------------------|------------------------------------|------------------------------|--------------------|
|                                 |                         |                                |                                    | <i>p</i> -Value              | OR (95% CI)        |
|                                 |                         |                                | Codominant (1 vs. 0 copies)        | <b>&lt;0.0001</b>            | 3.77 (2.98–4.76)   |
| 0 copies (-/-)                  | 281 (48.53%)            | 915 (79.91%)                   | Codominant (2 vs. 0 copies)        | <b>&lt;0.0001</b>            | 17.01 (7.73–37.39) |
| 1 copy (+/-)                    | 257 (44.39%)            | 222 (19.39%)                   | Dominant (1 + 2 vs. 0 copies)      | <b>&lt;0.0001</b>            | 4.23 (3.37–5.30)   |
| 2 copies (+/+)                  | 41 (7.08%)              | 8 (0.70%)                      | Recessive (2 vs. 0 + 1 copies)     | <b>&lt;0.0001</b>            | 10.98 (5.02–24.01) |
|                                 |                         |                                | Over-dominant (1 vs. 0 + 2 copies) | <b>&lt;0.0001</b>            | 3.30 (2.63–4.15)   |
|                                 |                         |                                | Log-additive                       | <b>&lt;0.0001</b>            | 3.85 (3.13–4.74)   |

Copy numbers of *HLA-DRB1\*15:01* alleles are presented with frequencies in parentheses. *P*, OR, and 95% CI values were adjusted for age and sex. CI: confidence interval; MS: multiple sclerosis; OR: odds ratio.

**Supplementary Table S2.** Comparison of *CD33* rs3865444 allele and genotype distribution between RR-MS, SP-MS, and control groups after stratification according to the *HLA-DRB1\*15:01* carrier status.

| A/G                                          | RR-MS        | SP-MS       | GM  | RR-MS vs. C  |                  | SP-MS vs. C   |                  | SP-MS vs. RR-MS |                  |
|----------------------------------------------|--------------|-------------|-----|--------------|------------------|---------------|------------------|-----------------|------------------|
|                                              |              |             |     | <i>p</i>     | OR (95% CI)      | <i>p</i>      | OR (95% CI)      | <i>p</i>        | OR (95% CI)      |
| <b><i>HLA-DRB1*15:01</i>-positive cohort</b> |              |             |     |              |                  |               |                  |                 |                  |
|                                              |              |             | AC  | 0.22         | 0.84 (0.64–1.11) | 0.18          | 0.70 (0.41–1.19) | 0.49            | 0.83 (0.49–1.41) |
| C                                            | 363 (70.62%) | 61 (74.39%) | CD1 | <b>0.049</b> | 0.66 (0.44–1.00) | <b>0.044</b>  | 0.48 (0.23–1.00) | 0.27            | 0.62 (0.28–1.37) |
| A                                            | 151 (29.38%) | 21 (25.61%) | CD2 | 0.53         | 0.81 (0.41–1.62) | 0.63          | 0.77 (0.24–2.46) | 0.42            | 0.61 (0.17–2.14) |
| CC                                           | 130 (50.58%) | 24 (58.54%) | D   | 0.061        | 0.69 (0.47–1.02) | 0.062         | 0.53 (0.27–1.04) | 0.20            | 0.62 (0.30–1.29) |
| CA                                           | 103 (40.08%) | 13 (31.71%) | R   | 0.97         | 0.99 (0.51–1.91) | 0.92          | 1.06 (0.34–3.29) | 0.63            | 0.75 (0.22–2.50) |
| AA                                           | 24 (9.34%)   | 4 (9.76%)   | OD  | 0.062        | 0.69 (0.47–1.02) | <b>0.05</b>   | 0.50 (0.25–1.02) | 0.31            | 0.68 (0.31–1.45) |
|                                              |              |             | LA  | 0.15         | 0.80 (0.60–1.08) | 0.16          | 0.68 (0.39–1.17) | 0.24            | 0.72 (0.41–1.26) |
| <b><i>HLA-DRB1*15:01</i>-negative cohort</b> |              |             |     |              |                  |               |                  |                 |                  |
|                                              |              |             | AC  | 0.10         | 1.19 (0.97–1.47) | <b>0.0007</b> | 0.23 (0.09–0.58) | <b>0.0002</b>   | 0.19 (0.08–0.50) |
| C                                            | 333 (65.55%) | 49 (90.74%) | CD1 | 0.078        | 1.31 (0.96–1.78) | <b>0.0017</b> | 0.25 (0.09–0.66) | <b>0.0055</b>   | 0.24 (0.08–0.71) |
| A                                            | 175 (34.45%) | 5 (9.26%)   | CD2 | 0.22         | 1.34 (0.83–2.17) | N/A           | N/A              | N/A             | N/A              |
| CC                                           | 109 (42.91%) | 22 (81.48%) | D   | 0.062        | 1.32 (0.99–1.76) | <b>0.0003</b> | 0.20 (0.08–0.55) | <b>0.0014</b>   | 0.20 (0.07–0.59) |
| CA                                           | 115 (45.28%) | 5 (18.52%)  | R   | 0.48         | 1.18 (0.75–1.86) | N/A           | N/A              | N/A             | N/A              |
| AA                                           | 30 (11.81%)  | 0 (0.00%)   | OD  | 0.15         | 1.24 (0.93–1.65) | <b>0.0062</b> | 0.29 (0.11–0.78) | <b>0.018</b>    | 0.30 (0.10–0.87) |
|                                              |              |             | LA  | 0.085        | 1.21 (0.98–1.49) | <b>0.0002</b> | 0.22 (0.09–0.57) | <b>0.0007</b>   | 0.22 (0.08–0.60) |

Allele and genotype counts are presented with frequencies in parentheses. *P*, OR, and 95% CI values for genotype comparisons were adjusted for age and sex. AC: allele contrast model (A vs. C); A/G: allele/genotype; C: controls; CD1: codominant model (CA vs. CC); CD2: codominant model (AA vs. CC); CI: confidence interval; D: dominant model (AA + CA vs. CC); GM: genetic model; LA: log-additive model; N/A: not applicable; OD: over-dominant model (CA vs. CC + AA); OR: odds ratio; R: recessive model (AA vs. CA + CC); RR-MS: relapsing-remitting multiple sclerosis; SP-MS: secondary progressive multiple sclerosis.
